# Supplementary material
Source: publisher site journal article supplement (https://www.spandidos-publications.com/2877/downloadSupplementary)
Supplement: Supplementary file 1 [file downloadSupplementary]

Figure S1. (A and B) Expression of MIR4713HG in CAL-27/SCC-9 cells transfected with different treatments was examined by RT-qPCR. The (A) overexpression and (B) knockdown efficiency were evaluated via pcDNA-MIR4713HG and sh-MIR4713HG, respectively. (C) Expression of MIR4713HG in subcutaneous tumor tissue and lung tissue transfected with different treatments was examined by RT-qPCR. Data are presented as the mean  $\pm$  SEM. \*\*\* $P$ <0.001. RT-qPCR, reverse transcription-quantitative PCR; sh-, short hairpin; NC, negative control.

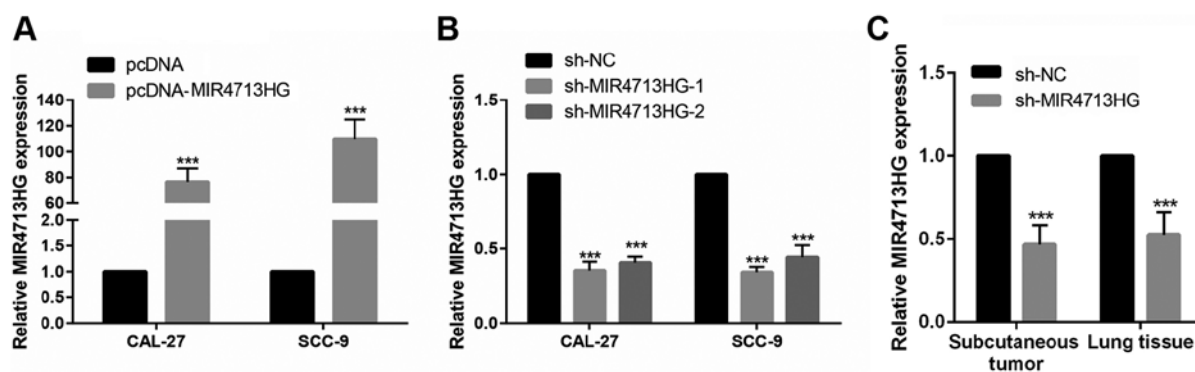

Figure S2. (A) Expression of let-7c-5p in normal oral epithelium tissues and OTSCC tissues from TCGA dataset. (B) The relative expression level of let-7c-5p in 20 paired OTSCC and adjacent non-tumor tissues. (C) Spearman correlation analysis between the expression of let-7c-5p and MIR4713HG in OTSCC from TCGA dataset. (D) Spearman correlation analysis between the expression of let-7c-5p and MIR4713HG in OTSCC tissues. (E and F) Expression of let-7c-5p in CAL-27/SCC-9 cells transfected with (E) let-7c-5p mimics and (F) let-7c-5p inhibitor was examined by RT-qPCR. (G) Expression of TMC7 in CAL-27/SCC-9 cells transfected with si-TMC7 was examined by RT-qPCR. Data are presented as the mean  $\pm$  SEM. \*\* $P < 0.01$  and \*\*\* $P < 0.001$ . OTSCC, oral tongue squamous cell carcinoma; TCGA, The Cancer Genome Atlas; TMC7, transmembrane channel like 7; si-, small interfering.

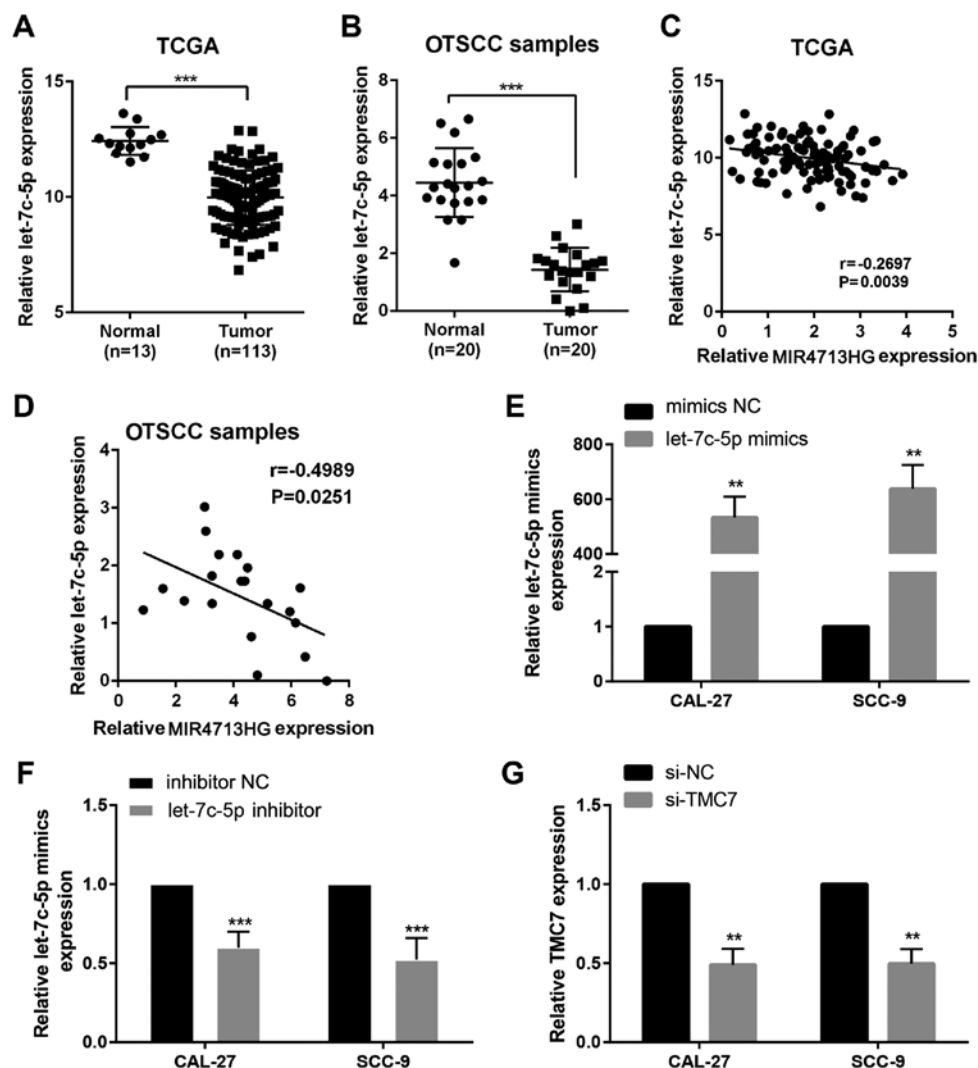

Table SI. Sequences against a specific target.

| Target                              | Sequence                      |
|-------------------------------------|-------------------------------|
| sh-MIR4713HG-1                      | 5'-TTCCTTGATATGATGTTCAAACC-3' |
| sh-MIR4713HG-2                      | 5'-TAGTTTTTGGACTCTTGAAGATG-3' |
| si-TMC7                             | 5'-ATATTGTATCTACCGTCTATT-3'   |
| sh-NC                               | 5'-TTCTCCGAACGTGTCACGT-3'     |
| let-7c-5p mimics (mature)           | 5'-UGAGGUAGUAGGUUGUAUGGUU-3'  |
| let-7c-5p mimics (complementary)    | 5'-AACCAUACAACCUACUACCUCA-3'  |
| let-7c-5p inhibitor (complementary) | 5'-AACCAUACAACCUACUACCUCA-3'  |

TMC7, transmembrane channel like 7; sh-, short hairpin; si-, small interfering; NC, negative control.

Table SII. Sequences of PCR primers used in the present study.

| Gene                                                        | Sequence                                                                 |
|-------------------------------------------------------------|--------------------------------------------------------------------------|
| MIR4713HG                                                   | F: 5'-AAATCACCCGTCTTCTGCG-3'<br>R: 5'-AACCCCGTCTCCACCAAA-3'              |
| TMC7                                                        | F: 5'-ATGAAGTATCTCTCCGAATGGGA-3'<br>R: 5'-TTCGTGAGTAAGACTGGGAGC-3'       |
| let-7c-5p                                                   | F: 5'-GCAGTGAGGTAGTAGGTTGTATG-3'<br>R: 5'-GGTCCAGTTTTTTTTTTTTTTTAACCA-3' |
| F, forward; R, reverse; TMC7, transmembrane channel like 7. |                                                                          |
